# Supplementary material
Source: Springer Nature journal article supplement (https://www.springermedizin.de/resource/supplementary/12913_2013_2675_MOESM4_ESM.pdf/9531116)
Supplement: MOESM4 [file 9531116]

|                                                       | <b>Constant</b> | <b><math>\beta</math></b> | <b>95% CI for <math>\beta</math></b> | <b>R<sup>2</sup></b> | <b>Pearson r</b> |
|-------------------------------------------------------|-----------------|---------------------------|--------------------------------------|----------------------|------------------|
| <b>Weighted data</b>                                  | 5.92            | -0.009                    | -0.010 to -0.009                     | 0.95                 | -0.98            |
| <b>Distance from population centroid (kilometres)</b> |                 |                           |                                      |                      |                  |
| (Main outcome)                                        |                 |                           |                                      |                      |                  |
| <b>Non-weighted data</b>                              | 5.92            | -0.009                    | -0.010 to -0.009                     | 0.95                 | -0.98            |
| <b>Distance from population centroid (kilometres)</b> |                 |                           |                                      |                      |                  |
